# Supplementary material for: Reduced graphene oxide (RGO) modified spongelike polypyrrole (PPy) aerogel for excellent electromagnetic absorption
Source: Royal Society of Chemistry journal article supplement (doi:10.1039/c5ta01577d), 2015-01-01
Supplement: c5ta01577d1.pdf [file c5ta01577d1.pdf]

### Electronic Supplementary Information

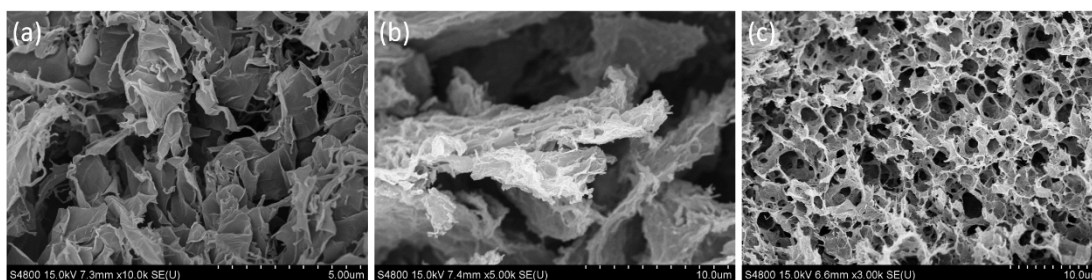

**Fig. S1** SEM image of GO (a), CMG (b), 3D-RGO (c).

#### S1 Sorption capacity test

The method developed for the measurement of oil and water sorption capacity of the sorbent was based on *ASTMF726-99: Standard Test Method for Sorbent Performance of Adsorbents*.

Kerosene (200 ml) was poured into a 500 ml beaker. The sorbent was weighed and the value recorded, and then it was immersed in the oil. In general, after 60 minutes of immersion, the sorbent was removed and allowed to drain for 5 minutes. The saturated sorbent was then immediately transferred to a pre-weighed weighing bottle and weighed. For the continued reuse of the sorbent, the saturated sorbent was removed to an flask and the extracted with petroleum ether (boiling range 60-90 °C) several times; subsequently, the sorbent was dried at 65 °C for 30 minutes for use in the next oil sorption test. The cycle of sorption and recovery was repeated 10 times to characterize the recycling performance. The oil sorption of the sorbent was calculated using the following equation:

$$\text{oil sorption (g g}^{-1}\text{)} = \frac{S_t - S_0}{S_0} \quad (1)$$

where  $S_0$  is the initial dry weight of the sorbent and  $S_t$  is the weight of the sorbent

with oil absorbed. Solvent sorption capacity measurements were carried out similarly.

All tests were performed at room temperature.

## **S2 Dye-uptake experiments**

The dyes, methyl orange (MO), methyl blue (MB), and rhodamine E (RE), were dissolved in distilled water to form solutions with an initial concentration of 1 mmol L<sup>-1</sup>. Then the sorbent was added to the above solution and the dye-uptake experiment was performed at room temperature. The concentration of the dye solutions was determined by UV-vis spectroscopy. The dye-uptake of the sorbent was expressed as the equilibrium absorption capacity of the dye per unit mass of the aerogel and calculated as follows:

$$Q_{eq} = \frac{(C_i - C_{eq})VM_d}{m_{ga}} \quad (2)$$

where  $Q_{eq}$  (mg g<sup>-1</sup>) is the absorption capacity;  $C_i$  (mmol mL<sup>-1</sup>) and  $C_{eq}$  (mmol mL<sup>-1</sup>) are the initial and final concentration of the dye solution;  $V$  (mL) is the volume of the dye solution;  $M_d$  (mg mmol<sup>-1</sup>) is the molecular weight of the dye;  $m_{ga}$  (g) is the weight of the sorbent.

**Tab. S1** Typical PPy based nanocomposites for EA materials (PBOPy: polybenzobisoxazole; Z-BCF: Z-type barium ferrite)

| Filler                                                                                                           | Matrix   | Loading ratio | RL <sub>max</sub><br>(dB) | Thickness<br>(mm) | Frequency range (GHz)<br>(RL below – 10 dB) | Effective bandwidth (GHz)<br>(RL below – 10 dB) | References |
|------------------------------------------------------------------------------------------------------------------|----------|---------------|---------------------------|-------------------|---------------------------------------------|-------------------------------------------------|------------|
| S-PPy/RGO                                                                                                        | Paraffin | 10.0 wt%      | – 54.4                    | 3.0               | 10.20-16.96                                 | 6.76                                            | This work  |
| RGO/PPy/Co <sub>3</sub> O <sub>4</sub>                                                                           | Paraffin | 50.0 wt%      | – 43.5                    | 3.2               | 8.90-15.30                                  | 6.40                                            | 1 (2013)   |
| PPy/RGO/Co <sub>3</sub> O <sub>4</sub>                                                                           | Paraffin | 50.0 wt%      | – 33.5                    | 2.5               | 11.64-18.00                                 | 6.36                                            | 2 (2013)   |
| PBOPy/PPy/Fe <sub>3</sub> O <sub>4</sub>                                                                         | Paraffin | 30.0 wt%      | – 23.3                    | 3.5               | 11.60-13.84                                 | 2.24                                            | 3 (2014)   |
| RGO/PPy/CoFe <sub>2</sub> O <sub>4</sub>                                                                         | Paraffin | 50.0 wt%      | – 50.8                    | 1.5               | 12.70-16.90                                 | 4.20                                            | 4 (2014)   |
| RGO/PPy/Fe <sub>3</sub> O <sub>4</sub>                                                                           | Paraffin | 50.0 wt%      | – 56.9                    | 5.3               | 5.31-8.00                                   | 2.69                                            | 5 (2014)   |
| Z-BCF/SiO <sub>2</sub> /PPy                                                                                      | Paraffin | 33.3 wt%      | –19.6                     | 2.0               | 12.94-18.00                                 | 5.06                                            | 6 (2014)   |
| PPy/BaFe <sub>12</sub> O <sub>19</sub> / Ni <sub>0.8</sub> Zn <sub>0.2</sub> Fe <sub>2</sub> O <sub>4</sub> /RGO | Paraffin | 30.0 wt%      | –25.5                     | 3.0               | 7.80-11.60                                  | 3.80                                            | 7 (2014)   |

**Tab. S2** Typical ICPs based nanocomposites for EA materials (SSP: solid-state polymerization)

| Filler    | Matrix   | Loading ratio | RL <sub>max</sub><br>(dB) | Thickness<br>(mm) | Frequency range (GHz)<br>(RL below – 10 dB) | Effective bandwidth (GHz)<br>(RL below – 10 dB) | References |
|-----------|----------|---------------|---------------------------|-------------------|---------------------------------------------|-------------------------------------------------|------------|
| S-PPy/RGO | Paraffin | 10.0 wt%      | – 54.4                    | 3.0               | 10.20-16.96                                 | 6.76                                            | This work  |

|                                                                                              |          |          |        |     |             |      |           |
|----------------------------------------------------------------------------------------------|----------|----------|--------|-----|-------------|------|-----------|
| PEDOT/RGO/Co <sub>3</sub> O <sub>4</sub>                                                     | Paraffin | 50.0 wt% | - 51.1 | 2.0 | 9.40-12.50  | 3.10 | 8 (2013)  |
| PANi/RGO                                                                                     | Paraffin | 10.0 wt% | - 36.9 | 3.5 | 8.20-13.50  | 5.30 | 9 (2014)  |
| 3D-RGO/PEDOT                                                                                 | Paraffin | 10.0 wt% | - 35.5 | 2.0 | 11.50-16.50 | 5.00 | 10 (2014) |
| SSP-PEDOT                                                                                    | Paraffin | 50.0 wt% | - 50.1 | 2.0 | 10.00-15.90 | 5.90 | 11 (2014) |
| Ni <sub>0.6</sub> Zn <sub>0.4</sub> Fe <sub>2</sub> O <sub>4</sub> /PANi                     | Paraffin | 70.0 wt% | - 41.0 | 2.6 | 10.62-15.62 | 5.00 | 12 (2015) |
| Ba <sub>0.85</sub> RE <sub>0.15</sub> Co <sub>2</sub> Fe <sub>16</sub> O <sub>27</sub> /PANi | Paraffin | 60.0 wt% | - 15.1 | 3.5 | 6.70-11.30  | 4.60 | 7 (2014)  |

---

## References

- 1 P. Liu and Y. Huang, *RSC Adv.*, 2013, **3**, 19033.
- 2 P. Liu, Y. Huang, L. Wang and W. Zhang, *J. Alloy. Comp.*, 2013, **573**, 151.
- 3 Y. Li, D. Chen, X. Liu, Y. Zhou, Q. Zhuang, R. Cai and K. Zhang, *Comp. Sci. Technol.*, 2014, **100**, 212.
- 4 P. Liu, Y. Huang and X. Zhang, *Mater. Lett.*, 2014, **136**, 298.
- 5 P. Liu, Y. Huang and X. Zhang, *Mater. Lett.*, 2014, **129**, 35.
- 6 J. Shen, K. Chen, L. Li, W. Wang and Y. Jin, *J. Alloy. Comp.*, 2014, **615**, 488.
- 7 Y. Wang, Y. Huang and J. Ding, *Synthetic Met.*, 2014, **196**, 125.
- 8 P. B. Liu, Y. Huang and X. Sun, *ACS Appl. Mater. Interfaces*, 2013, **5**, 12355.
- 9 X. Chen, F. Meng, Z. Zhou, X. Tian, L. Shan, S. Zhu, X. Xu, M. Jiang, L. Wang, D. Hui, Y. Wang, J. Lu and J. Gou, *Nanoscale*, 2014, **6**, 8140.
- 10 F. Wu, Y. Wang and M. Wang, *RSC Adv.*, 2014, **4**, 49780.
- 11 F. Wu, Z. Xu, Y. Wang and M. Wang, *RSC Adv.*, 2014, **4**, 38797.
- 12 M. Wang, G. Ji, B. Zhang, D. Tang, Y. Yang and Y. Du, *J. Magnet. Magnet. Mater.*, 2015, **377**, 52.
